# Supplementary material
Source: Research Square preprint supplement (doi:10.21203/rs.3.rs-10236533/v1)
Supplement: Supplementary file 1 [file 16bc4de77a7d813fff9727c7.docx]

# ANNEXURE A: MEASUREMENT SCALE ITEMS WITH ADOPTED SOURCES

The following table presents all scale items used in the study. Each row identifies the item code, the construct, the verbatim item wording as adapted for this study, and the primary source(s) from which the item was adopted or adapted. All items are rated on a seven-point Likert scale (1 = Strongly Disagree; 5 = Strongly Agree).

| Code | Construct | Item Wording (5-point Likert) | Adopted From |
| --- | --- | --- | --- |
| PI1 | Perceived Intelligence | The AI recommendation system on this platform understands my shopping preferences well. | Davenport et al. (2020); Tran et al. (2023) |
| PI2 | Perceived Intelligence | The AI features on this platform provide me with smart and relevant product suggestions. | Kim et al. (2021) |
| PI3 | Perceived Intelligence | The AI system on this platform seems to learn from my past behaviour and improve its suggestions. | Rese et al. (2017) |
| PI4 | Perceived Intelligence | I consider the AI on this platform to be intelligent in how it assists my shopping. | Davenport et al. (2020) |
| PQ1 | Personalisation Quality | The product recommendations I receive on this platform are highly relevant to my needs. | Zhang et al. (2021) |
| PQ2 | Personalisation Quality | This platform tailors my shopping experience in a way that matches my preferences. | Chung et al. (2020) |
| PQ3 | Personalisation Quality | The personalised offers and promotions on this platform are appropriate for me. | Li & Karahanna (2015) |
| PQ4 | Personalisation Quality | I feel that this platform genuinely understands what I am looking for. | Chung et al. (2020) |
| PINT1 | Perceived Interactivity | The AI-powered features on this platform allow me to interact with them easily. | Steuer (1992); Wu & Chen (2020) |
| PINT2 | Perceived Interactivity | The chatbot or virtual assistant on this platform responds to me in a natural and helpful way. | Pitardi & Marriott (2021) |
| PINT3 | Perceived Interactivity | I can communicate my shopping needs effectively through the AI features on this platform. | Wu & Chen (2020) |
| PINT4 | Perceived Interactivity | The AI-driven interactions on this platform feel responsive and engaging. | Huang & Rust (2021) |
| AIT1 | AI-Driven Trust | I trust the AI system on this platform to protect my personal data and preferences. | McKnight et al. (2002); Mayer et al. (1995) |
| AIT2 | AI-Driven Trust | I believe the AI recommendations on this platform are unbiased and genuinely helpful. | Gefen et al. (2003) |
| AIT3 | AI-Driven Trust | I feel confident that the AI system on this platform operates in my best interests. | Pavlou (2003) |
| AIT4 | AI-Driven Trust | I can rely on the AI features of this platform to provide me with accurate information. | Tran et al. (2023) |
| PU1 | Perceived Usefulness | Using AI features on this platform helps me find products more quickly. | Davis (1989); Pillai et al. (2020) |
| PU2 | Perceived Usefulness | The AI features on this platform improve the overall quality of my shopping experience. | Venkatesh & Davis (2000) |
| PU3 | Perceived Usefulness | Using AI features on this platform allows me to make better purchasing decisions. | Sharma et al. (2022) |
| PU4 | Perceived Usefulness | Overall, the AI capabilities of this platform are useful to me as a shopper. | Davis (1989) |
| ATT1 | Attitude Toward AI Shopping | I have a positive attitude toward shopping on platforms that use AI features. | Ajzen (1991); Sharma et al. (2022) |
| ATT2 | Attitude Toward AI Shopping | I prefer AI-enhanced shopping platforms over platforms without AI features. | Pillai et al. (2020) |
| ATT3 | Attitude Toward AI Shopping | Shopping with AI assistance is a good idea. | Venkatesh & Davis (2000) |
| ATT4 | Attitude Toward AI Shopping | I enjoy the shopping experience when AI features are actively involved. | Huang & Rust (2021) |
| PIINT1 | Purchase Intention | I intend to continue purchasing products through this AI-enabled platform. | Ajzen (1991); Ribbink et al. (2004) |
| PIINT2 | Purchase Intention | I plan to increase my frequency of purchases on this platform in the future. | Anderson & Srinivasan (2003) |
| PIINT3 | Purchase Intention | I would choose this platform over alternatives for my future purchases. | Bhat & Singh (2021) |
| PIINT4 | Purchase Intention | I am likely to purchase from this platform again the next time I shop online. | Tandon et al. (2022) |
| LOY1 | Customer Loyalty | I consider myself a loyal customer of this platform. | Srinivasan et al. (2002) |
| LOY2 | Customer Loyalty | I would recommend this platform to others because of its AI-enhanced features. | Oliver (1999) |
| LOY3 | Customer Loyalty | Even if other platforms offer similar products, I prefer to shop here. | Ribbink et al. (2004) |
| LOY4 | Customer Loyalty | I am unlikely to switch to another platform in the near future. | Bhat & Singh (2021) |
| LOY5 | Customer Loyalty | I say positive things about this platform and its AI features to people I know. | Srinivasan et al. (2002) |
